# Supplementary material for: Toward the Autism Motor Signature: Gesture patterns during smart tablet gameplay identify children with autism
Source: PubMed Central journal article supplement (PMC4995518; doi:10.1038/srep31107), 2016-08-24
Supplement: srep31107-s1.pdf [file srep31107-s1.pdf]

TOWARD THE AUTISM MOTOR SIGNATURE SUPPLEMENTAL TABLE 1.

Anzulewicz, A., Sobota, K. & Delafield-Butt, J. T. Toward the autism motor signature: Gesture patterns during smart tablet gameplay identify children with autism. *Sci. Rep.* **6**, doi:10.1038/srep31107 (2016).

**Supplemental Table 1.** Simple computational features derived from the iPad’s sensors and selected for machine learning analysis.

| <b>Feature Name</b>          |
|------------------------------|
| <b>Touch Screen Features</b> |
| Velocity                     |
| Acceleration                 |
| Deceleration                 |
| MovementAngle                |
| DirectDistance               |
| MovementEfficiency           |
| MovementUniformity           |
| MovementTargeting            |
| Skewness                     |
| MoveAndTapDelay              |
| TapPrecision                 |
| MovementSpeed                |
| TapFrequency                 |
| Jerk                         |
| OvershotNumber               |
| OvershotLength               |
| TouchGestureCount            |
| AvgDirectnessIndex           |
| DirectnessIndexMin           |
| DirectnessIndexMax           |
| DirectnessIndexRange         |
| DirectnessIndexStdDev        |
| DirectnessIndexMedian        |
| GestureDurationMedian        |
| GestureDurationMin           |
| GestureDurationMax           |
| GestureDurationRange         |
| GestureDurationStdDev        |
| AvgGestureDuration           |
| GesturesAreaMedian           |

TOWARD THE AUTISM MOTOR SIGNATURE SUPPLEMENTAL TABLE 1.

|                               |
|-------------------------------|
| GesturesAreaMin               |
| GesturesAreaMax               |
| GesturesAreaRange             |
| GesturesAreaStdDev            |
| AvgGesturesArea               |
| GesturesHeightMedian          |
| GesturesHeightMin             |
| GesturesHeightMax             |
| GesturesHeightRange           |
| GesturesHeightStdDev          |
| AvgGesturesHeight             |
| GesturesWidthMedian           |
| GesturesWidthMin              |
| GesturesWidthMax              |
| GesturesWidthRange            |
| GesturesWidthStdDev           |
| AvgGesturesWidth              |
| GestureVelocityMedian         |
| GestureVelocityMin            |
| GestureVelocityMax            |
| GestureVelocityRange          |
| GestureVelocityStdDev         |
| AvgGestureVelocity            |
| TouchEventPerGestureMedian    |
| TouchEventPerGestureMin       |
| TouchEventPerGestureMax       |
| TouchEventPerGestureRange     |
| TouchEventPerGestureStdDev    |
| AvgTouchEventPerGesture       |
| GesturesAccelerationMedian    |
| GesturesAccelerationMin       |
| GesturesAccelerationMax       |
| GesturesAccelerationRange     |
| GesturesAccelerationStdDev    |
| AvgGesturesAcceleration       |
| GesturesDecelerationMedian    |
| GesturesDecelerationMin       |
| GesturesDecelerationMax       |
| GesturesDecelerationRange     |
| GesturesDecelerationStdDev    |
| MultitouchGesturesCountMedian |
| MultitouchGesturesCountMin    |
| MultitouchGesturesCountMax    |
| MultitouchGesturesCountRange  |

TOWARD THE AUTISM MOTOR SIGNATURE SUPPLEMENTAL TABLE 1.

|                                 |
|---------------------------------|
| MultitouchGesturesCountStdDev   |
| AvgMultitouchGesturesCount      |
| TapNumberMedian                 |
| TapNumberMin                    |
| TapNumberMax                    |
| TapNumberRange                  |
| TapNumberStdDev                 |
| AvgTapNumber                    |
| MovementBreaksMedian            |
| MovementBreaksMax               |
| MovementBreaksRange             |
| MovementBreaksStdDev            |
| AvgMovementBreaks               |
| AvgGesturesJerk                 |
| GesturesJerkMin                 |
| GesturesJerkMax                 |
| GesturesJerkRange               |
| GesturesJerkMedian              |
| GesturesJerkStdDev              |
|                                 |
| <b>Inertial Sensor Features</b> |
| AccelerationMean_x              |
| AccelerationMean_y              |
| AccelerationMean_z              |
| AccelerationCorrelation_0_0     |
| AccelerationCorrelation_0_1     |
| AccelerationCorrelation_0_2     |
| AccelerationCorrelation_1_0     |
| AccelerationCorrelation_1_1     |
| AccelerationCorrelation_1_2     |
| AccelerationCorrelation_2_0     |
| AccelerationCorrelation_2_1     |
| AccelerationCorrelation_2_2     |
| AccelerationMagnitudeMax        |
| AccelerationMagnitudeMin        |
| AccelerationMax_x               |
| AccelerationMax_y               |
| AccelerationMax_z               |
| AccelerationMeanMagnitude       |
| AccelerationMedian_x            |
| AccelerationMedian_y            |
| AccelerationMedian_z            |
| AccelerationMin_x               |
| AccelerationMin_y               |

TOWARD THE AUTISM MOTOR SIGNATURE SUPPLEMENTAL TABLE 1.

|                                |
|--------------------------------|
| AccelerationMin_z              |
| AccelerationRange_x            |
| AccelerationRange_y            |
| AccelerationRange_z            |
| AccelerationRMS_x              |
| AccelerationRMS_y              |
| AccelerationRMS_z              |
| AccelerationStdDev_x           |
| AccelerationStdDev_y           |
| AccelerationStdDev_z           |
| AccelerationZeroCrossing_x     |
| AccelerationZeroCrossing_y     |
| AccelerationZeroCrossing_z     |
| AccelerationZeroCrossingRate_x |
| AccelerationZeroCrossingRate_y |
| AccelerationZeroCrossingRate_z |
| JerkMean_x                     |
| JerkMean_y                     |
| JerkMean_z                     |
| JerkCorrelation_0_0            |
| JerkCorrelation_0_1            |
| JerkCorrelation_0_2            |
| JerkCorrelation_1_0            |
| JerkCorrelation_1_1            |
| JerkCorrelation_1_2            |
| JerkCorrelation_2_0            |
| JerkCorrelation_2_1            |
| JerkCorrelation_2_2            |
| JerkMagnitudeMax               |
| JerkMagnitudeMin               |
| JerkMax_x                      |
| JerkMax_y                      |
| JerkMax_z                      |
| JerkMin_x                      |
| JerkMin_y                      |
| JerkMin_z                      |
| JerkMedian_x                   |
| JerkMedian_y                   |
| JerkMedian_z                   |
| JerkMeanMagnitude              |
| JerkRange_x                    |
| JerkRange_y                    |
| JerkRange_z                    |
| JerkRMS_x                      |

TOWARD THE AUTISM MOTOR SIGNATURE SUPPLEMENTAL TABLE 1.

|                         |
|-------------------------|
| JerkRMS_y               |
| JerkRMS_z               |
| JerkStdDev_x            |
| JerkStdDev_y            |
| JerkStdDev_z            |
| JerkZeroCrossing_x      |
| JerkZeroCrossing_y      |
| JerkZeroCrossing_z      |
| AttitudeMean_x          |
| AttitudeMean_y          |
| AttitudeMean_z          |
| AttitudeCorrelation_0_0 |
| AttitudeCorrelation_0_1 |
| AttitudeCorrelation_0_2 |
| AttitudeCorrelation_1_0 |
| AttitudeCorrelation_1_1 |
| AttitudeCorrelation_1_2 |
| AttitudeCorrelation_2_0 |
| AttitudeCorrelation_2_1 |
| AttitudeCorrelation_2_2 |
| AttitudeMagnitudeMax    |
| AttitudeMagnitudeMin    |
| AttitudeMax_x           |
| AttitudeMax_y           |
| AttitudeMax_z           |
| AttitudeMeanMagnitude   |
| AttitudeMedian_x        |
| AttitudeMedian_y        |
| AttitudeMedian_z        |
| AttitudeMin_x           |
| AttitudeMin_y           |
| AttitudeMin_z           |
| AttitudeRange_x         |
| AttitudeRange_y         |
| AttitudeRange_z         |
| AttitudeRMS_x           |
| AttitudeRMS_y           |
| AttitudeRMS_z           |
| AttitudeStdDev_x        |
| AttitudeStdDev_y        |
| AttitudeStdDev_z        |
| AttitudeZeroCrossing_x  |
| AttitudeZeroCrossing_y  |
| AttitudeZeroCrossing_z  |

TOWARD THE AUTISM MOTOR SIGNATURE SUPPLEMENTAL TABLE 1.

|                            |
|----------------------------|
| AttitudeZeroCrossingRate_x |
| AttitudeZeroCrossingRate_y |
| AttitudeZeroCrossingRate_z |
| RotationMean_x             |
| RotationMean_y             |
| RotationMean_z             |
| RotationCorrelation_0_0    |
| RotationCorrelation_0_1    |
| RotationCorrelation_0_2    |
| RotationCorrelation_1_0    |
| RotationCorrelation_1_1    |
| RotationCorrelation_1_2    |
| RotationCorrelation_2_0    |
| RotationCorrelation_2_1    |
| RotationCorrelation_2_2    |
| RotationMagnitudeMax       |
| RotationMagnitudeMin       |
| RotationMax_x              |
| RotationMax_y              |
| RotationMax_z              |
| RotationMeanMagnitude      |
| RotationMedian_x           |
| RotationMedian_y           |
| RotationMedian_z           |
| RotationMin_x              |
| RotationMin_y              |
| RotationMin_z              |
| RotationRange_x            |
| RotationRange_y            |
| RotationRange_z            |
| RotationRMS_x              |
| RotationRMS_y              |
| RotationRMS_z              |
| RotationStdDev_x           |
| RotationStdDev_y           |
| RotationStdDev_z           |
| RotationZeroCrossing_x     |
| RotationZeroCrossing_y     |
| RotationZeroCrossing_z     |
| RotationZeroCrossingRate_x |
| RotationZeroCrossingRate_y |
| RotationZeroCrossingRate_z |

## TOWARD THE AUTISM MOTOR SIGNATURE SUPPLEMENTAL TABLE 1.

### Notes:

#### Touch Features:

[FeatureName][Suffix(optional)]

Every feature starts with the name e.g. Velocity

Some of the features contains also type e.g. GesturesHeight**Median** indicates median of the gestures height

#### Sensors Features:

[Data Type][FeatureName][Suffix(optional)]

Each feature name starts with the data type used to calculate feature: Acceleration for accelerometer based features, Rotation for raw gyroscope data, Attitude for Euler angles calculated from the gyroscope data

Second factor is the feature name

There're two type of suffixes:

\_x,\_y,\_z for the position in 3D space(vector)

\_number\_number (e.g. \_1\_1) for matrices. First number indicates row, second column in the matrix
